# Supplementary material for: Microtubule-associated protein 1b is required for shaping the neural tube
Source: PubMed Central journal article supplement (PMC4717579; doi:10.1186/s13064-015-0056-4), 2016-01-18

**A**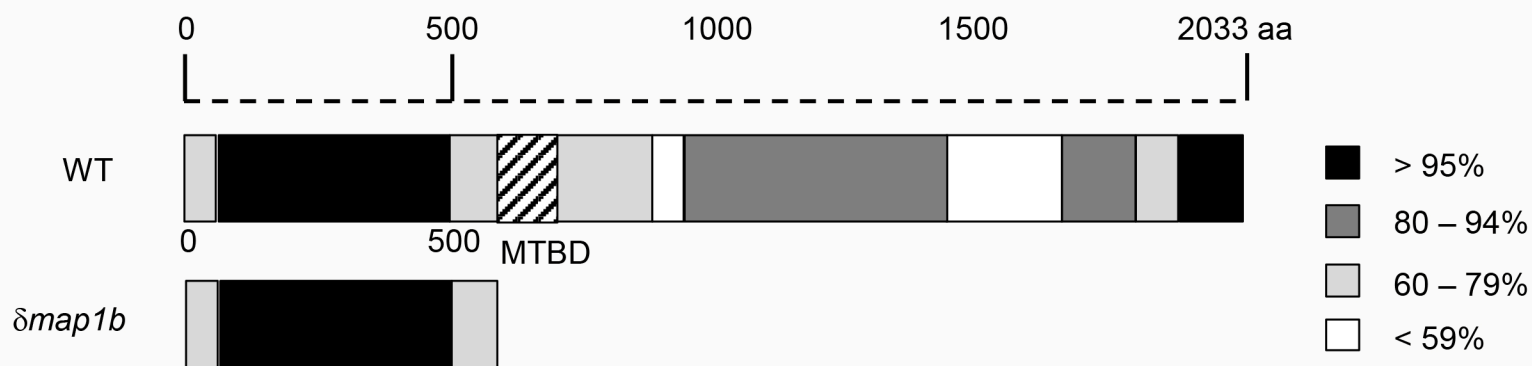**B**

*$\delta map1b$*  RNA titration using morphology of 24 hpf as readout

| $\delta map1b$ conc | WT    | Mild  | Moderate | Severe | Very severe |
|---------------------|-------|-------|----------|--------|-------------|
| Uninjected          | 100%  | 0%    | 0%       | 0%     | 0%          |
| 25 ng/ml            | 65%   | 20%   | 10%      | 5%     | 0%          |
| 50 ng/ml            | 48.5% | 9.1%  | 12.1%    | 18.2%  | 12.1%       |
| 75 ng/ml            | 7.7%  | 15.4% | 0%       | 38.5%  | 38.5%       |
| 100 ng/ml           | 0%    | 0%    | 27.3%    | 54.5%  | 18.2%       |

**C**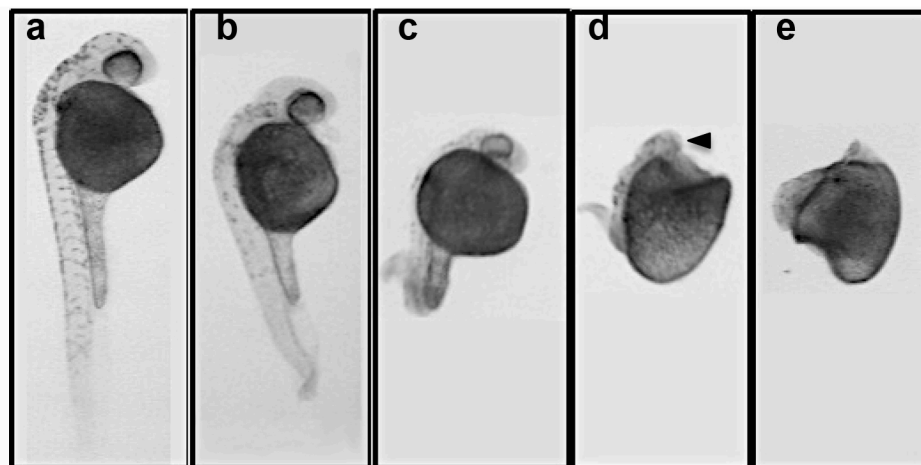

Supplement: 13064_2015_56_MOESM6_ESM.pdf [file 13064_2015_56_MOESM6_ESM.pdf]
