# Supplementary material for: Microtubule-associated protein 1b is required for shaping the neural tube
Source: PubMed Central journal article supplement (PMC4717579; doi:10.1186/s13064-015-0056-4), 2016-01-18

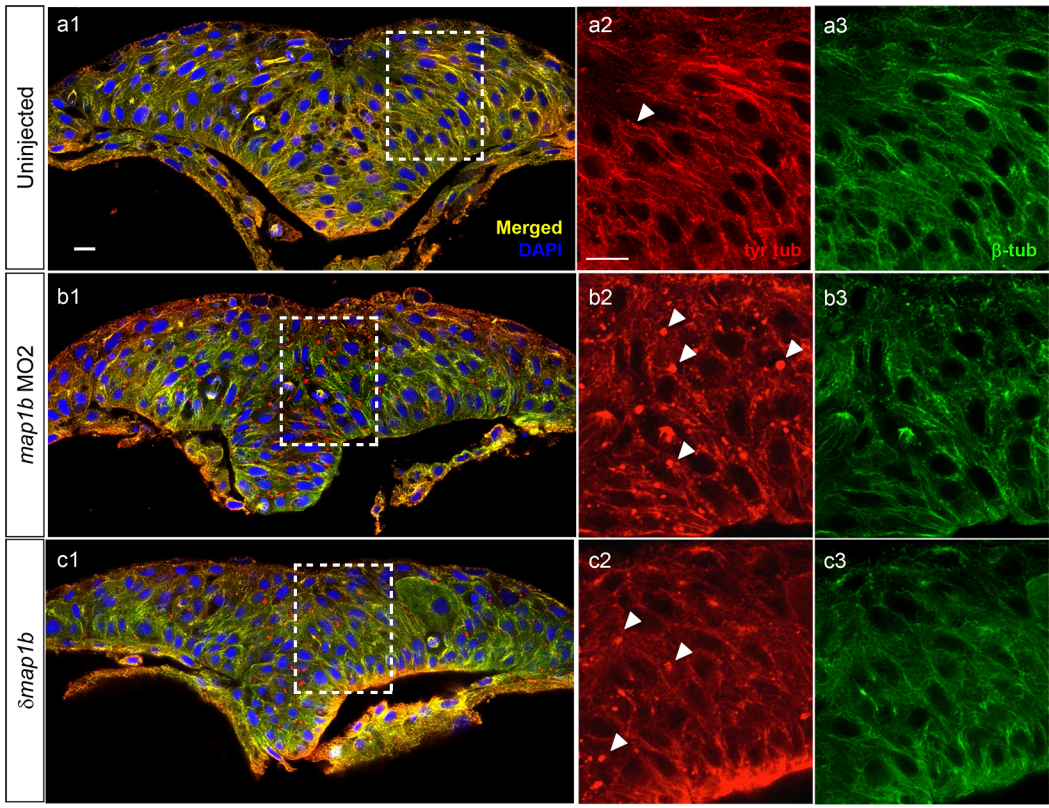

Supplement: 13064_2015_56_MOESM7_ESM.pdf [file 13064_2015_56_MOESM7_ESM.pdf]
